# Supplementary material for: Effect of spacer length of ionic liquid-type imidazolium gemini surfactant-based water-in-oil microemulsion for the extraction of gold from hydrochloric acid
Source: Royal Society of Chemistry journal article supplement (doi:10.1039/c7nj00551b), 2017-01-01
Supplement: c7nj00551b1.pdf [file c7nj00551b1.pdf]

Electronic Supplementary Material (ESI) for New Journal of Chemistry.

This journal is © The Royal Society of Chemistry and the Centre National de la Recherche Scientifique 2017

## **Effect of Spacer Length of Ionic Liquid-Type Imidazolium Gemini Surfactant Based Water-in-Oil Microemulsion for Extraction of Gold from Hydrochloric Acid Medium**

Zeyang Xiang <sup>a</sup>, Yan Zheng, <sup>a</sup> Hong Zhang, <sup>a</sup> Yan Yan, <sup>a</sup> Xiaoyu Yang, <sup>a</sup> Xia Xin <sup>b\*</sup>, Yanzhao Yang <sup>a\*</sup>

<sup>a</sup> *Key Laboratory for Special Functional Aggregate Materials of Education Ministry, School of Chemistry and Chemical Engineering, Shandong University, Jinan, 250100, PR China*

<sup>b</sup> *National Engineering Technology Research Center For Colloidal Materials, Shandong University, Jinan, 250100, PR China*

---

\* Author to whom correspondence should be addressed, E-mail: [xinx@sdu.edu.cn](mailto:xinx@sdu.edu.cn).

Phone: +86-531-88363597. Fax: +86-531-88361008

\* Author to whom correspondence should be addressed, E-mail: [yzhyang@sdu.edu.cn](mailto:yzhyang@sdu.edu.cn)

Phone: +86-531-88362988. Fax: +86-531-88564464

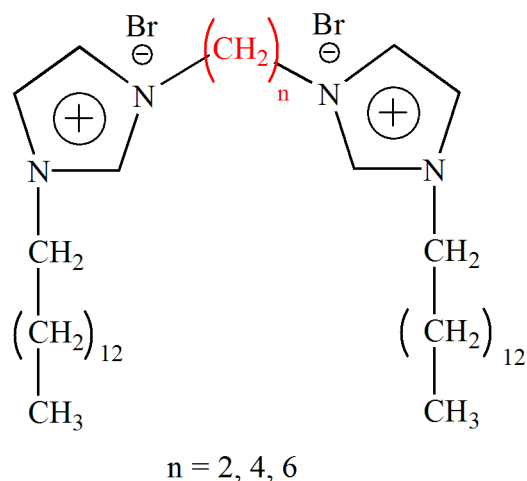

**Fig. S1.** The chemical structures of ionic liquid-type gemini imidazolium surfactants with different spacer lengths

### Synthesis of ionic liquid-type imidazolium gemini surfactants

This class of ionic liquid-type imidazolium gemini surfactants were synthesized by mixing 0.05 mol of imidazolium and 0.052 mol of sodium hydroxide in 35 mL of dimethyl sulfoxide with stirring for 2 h at room temperature. After that, 0.04 mol of 1-bromotetradecan was added drop wise and the mixture was stirred at room temperature for 8-10 h. The resulting mixture was then dissolved in 35 mL of chloroform. The solution was washed several times with deionized water. Residual solvent was removed under vacuum for 1 h at 40 °C. Then, 0.01 mol, 1,2-dibromoethane, 1,4-dibromobutane, or 1,6-dibromohexane was added drop wise with absolute ethyl alcohol and the mixture was refluxed

at 80 °C with stirring for 48 h under nitrogen atmosphere. The obtained products were purified twice by recrystallization in ethyl acetate and then dried under vacuum for 2 day.<sup>1</sup>

The schematic diagram of synthesis route is presented in Figure S2. The <sup>1</sup>H-NMR spectra of [C<sub>14</sub>-n-C<sub>14</sub>im]Br<sub>2</sub> (n = 2, 4, 6) in CDCl<sub>3</sub> is presented in Figure S3, S6, S8, respectively. All the products are characterized through <sup>1</sup>H-NMR spectrum (AV300, Bruker) in CDCl<sub>3</sub> and the result are shown below.

(1) 1,2-bis(3-myristylimidazolium-1-yl) ethane bromide [C<sub>14</sub>-2-C<sub>14</sub>im]Br<sub>2</sub>

<sup>1</sup>H-NMR (300MHz, CDCl<sub>3</sub>): δ (ppm) 10.37 (s, 2H), 8.86 (s, 2H), 7.13 (s, 2H), 5.33 (s, 4H), 4.15 (s, 4H), 1.92 (s, 4H), 1.30 (d, 44H), 0.88 (t, 6H)

(2) 1,4-bis(3-myristylimidazolium-1-yl) butane bromide [C<sub>14</sub>-4-C<sub>14</sub>im]Br<sub>2</sub>

<sup>1</sup>H-NMR (300MHz, CDCl<sub>3</sub>): δ (ppm) 10.35 (s, 2H), 8.01 (s, 2H), 7.17 (s, 2H), 4.60 (s, 4H), 4.25 (t, 4H), 2.24 (s, 4H), 1.91 (s, 4H), 1.28 (m, 44H), 0.88 (t, 6H).

(3) 1,6-bis(3-myristylimidazolium-1-yl) hexane bromide [C<sub>14</sub>-6-C<sub>14</sub>im]Br<sub>2</sub>

<sup>1</sup>H-NMR (300MHz, CDCl<sub>3</sub>): δ (ppm) 10.75 (s, 2H), 8.03 (s, 2H), 7.38 (s, 2H), 4.66 (t, 4H), 4.49 (t, 4H), 2.25 (d, 4H), 2.11 (s, 4H), 1.73 (s, 4H), 1.48 (d, 44H), 0.88 (t, 6H).

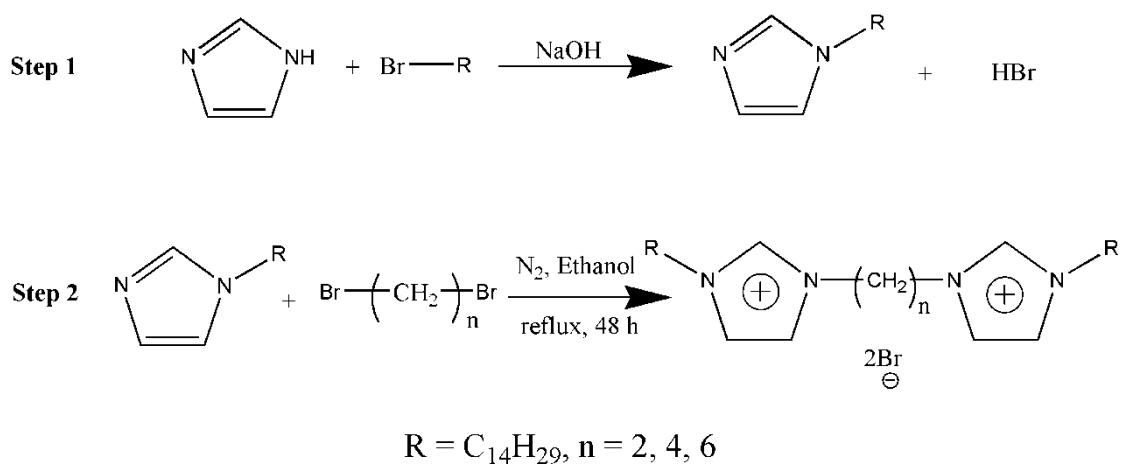

**Fig. S2.** The synthesis route of ionic liquid-type gemini imidazolium surfactants

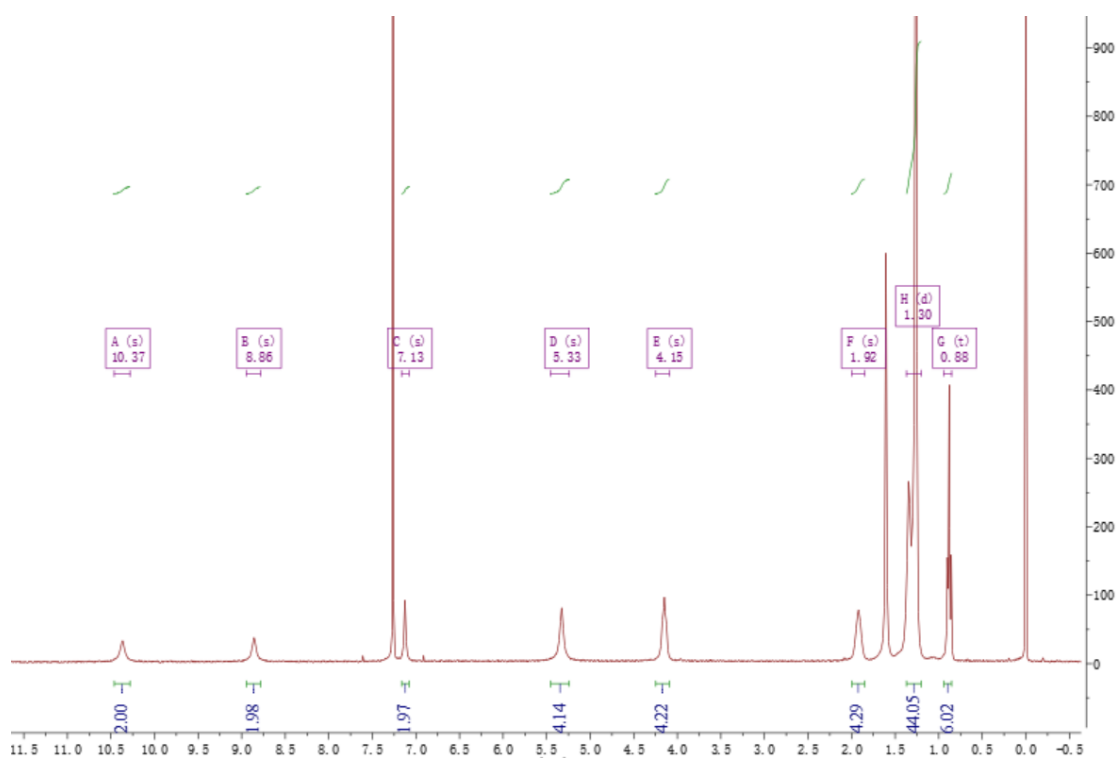

**Fig. S3.** The  $^1\text{H-NMR}$  spectra of  $[\text{C}_{14}\text{-2-C}_{14}\text{im}]\text{Br}_2$  in  $\text{CDCl}_3$

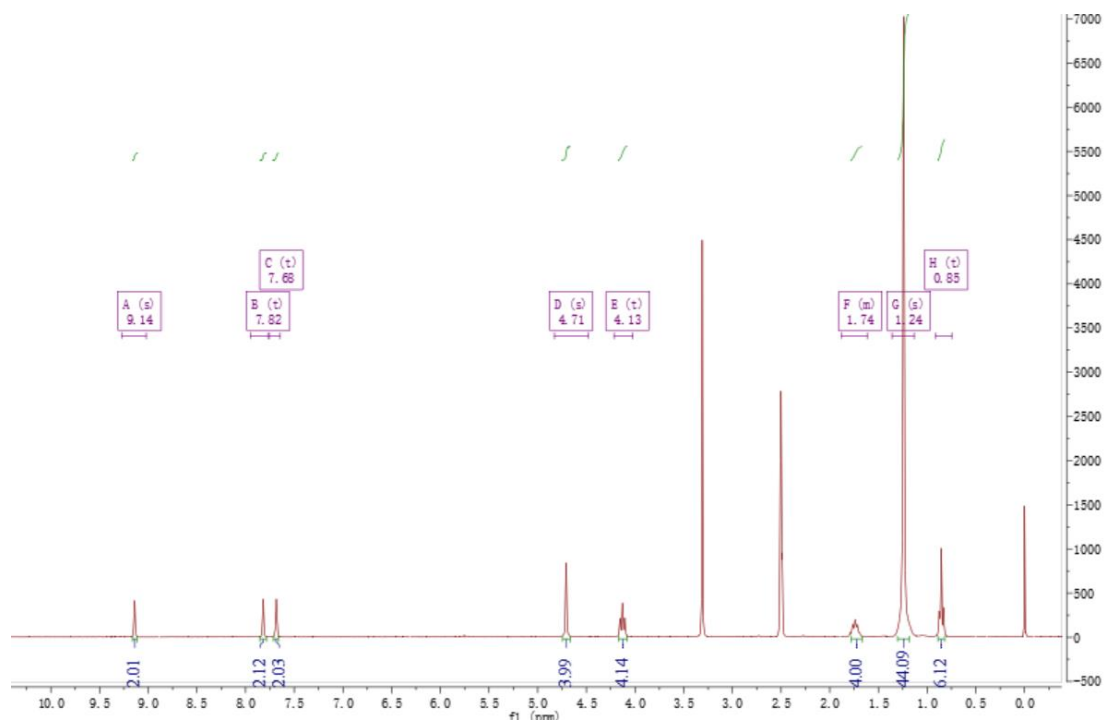

**Fig. S4.** The <sup>1</sup>H-NMR spectra of [C<sub>14</sub>-2-C<sub>14</sub>im]Br<sub>2</sub> in DMSO

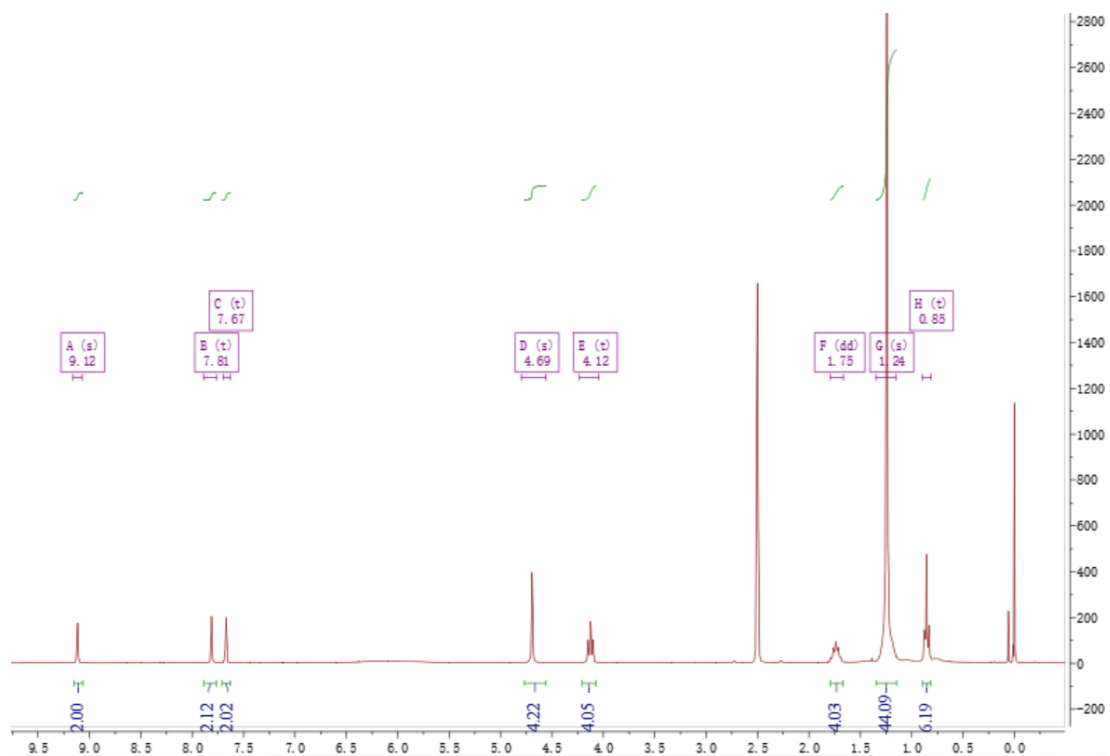

**Fig. S5.** The <sup>1</sup>H-NMR spectra of [C<sub>14</sub>-2-C<sub>14</sub>im]-Au (III) in DMSO

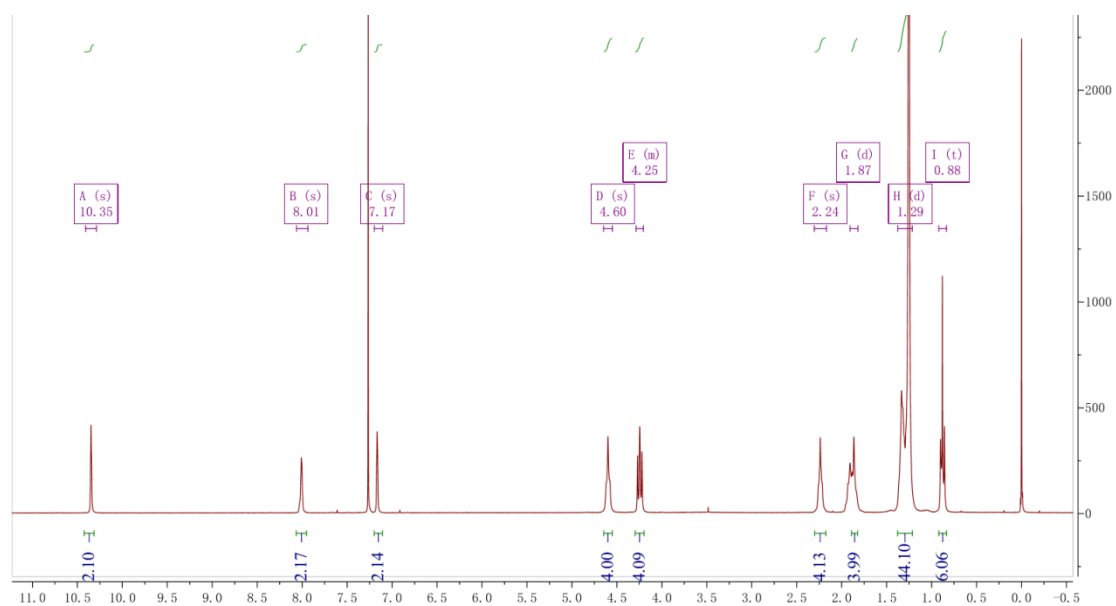

**Fig. S6.** The  $^1\text{H-NMR}$  spectra of  $[\text{C}_{14}\text{-4-C}_{14}\text{im}]\text{Br}_2$   $\text{CDCl}_3$

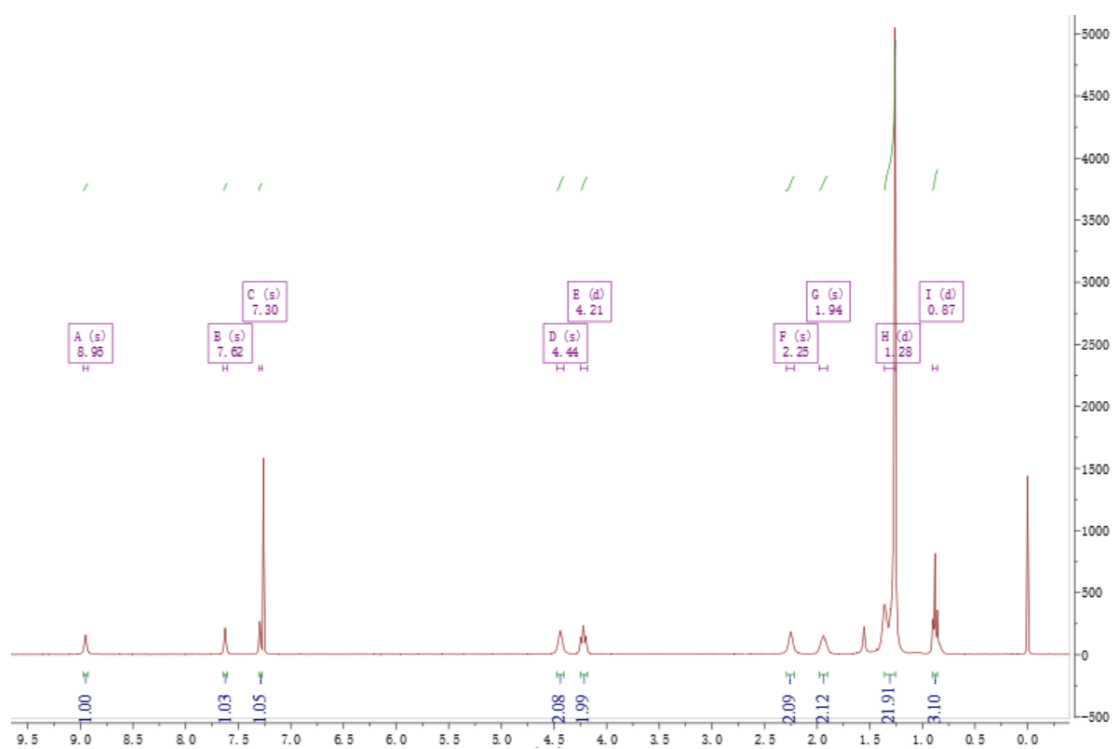

**Fig. S7.** The  $^1\text{H-NMR}$  spectra of  $[\text{C}_{14}\text{-4-C}_{14}\text{im}]\text{-Au (III)}$  in  $\text{CDCl}_3$

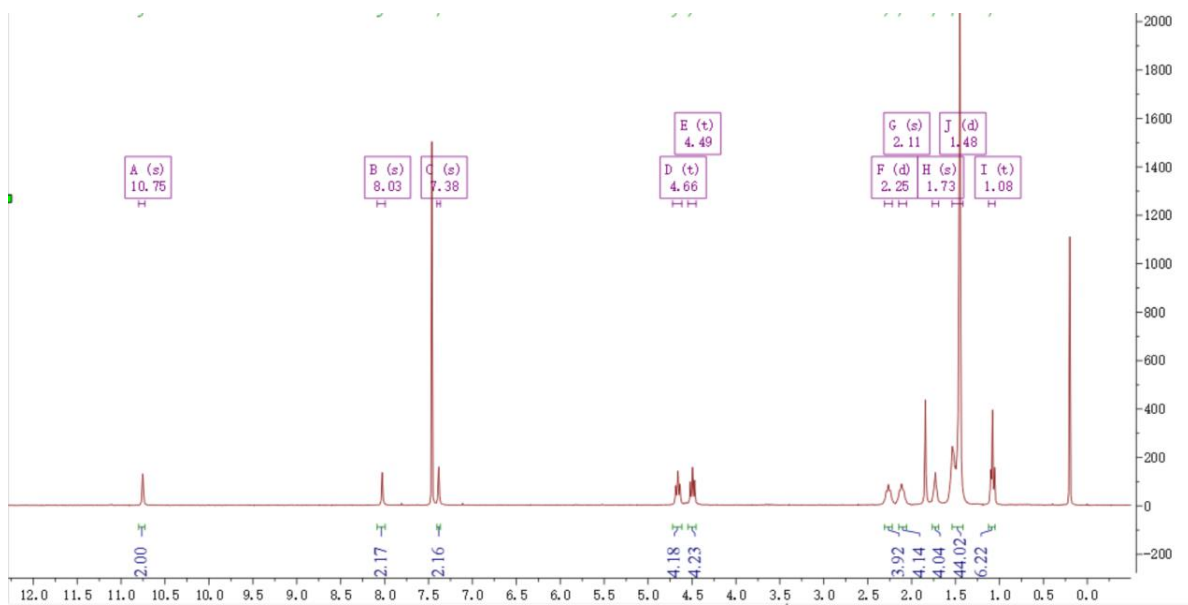

**Fig. S8.** The  $^1\text{H-NMR}$  spectra of  $[\text{C}_{14}\text{-6-C}_{14}\text{im}]\text{Br}_2$  in  $\text{CDCl}_3$

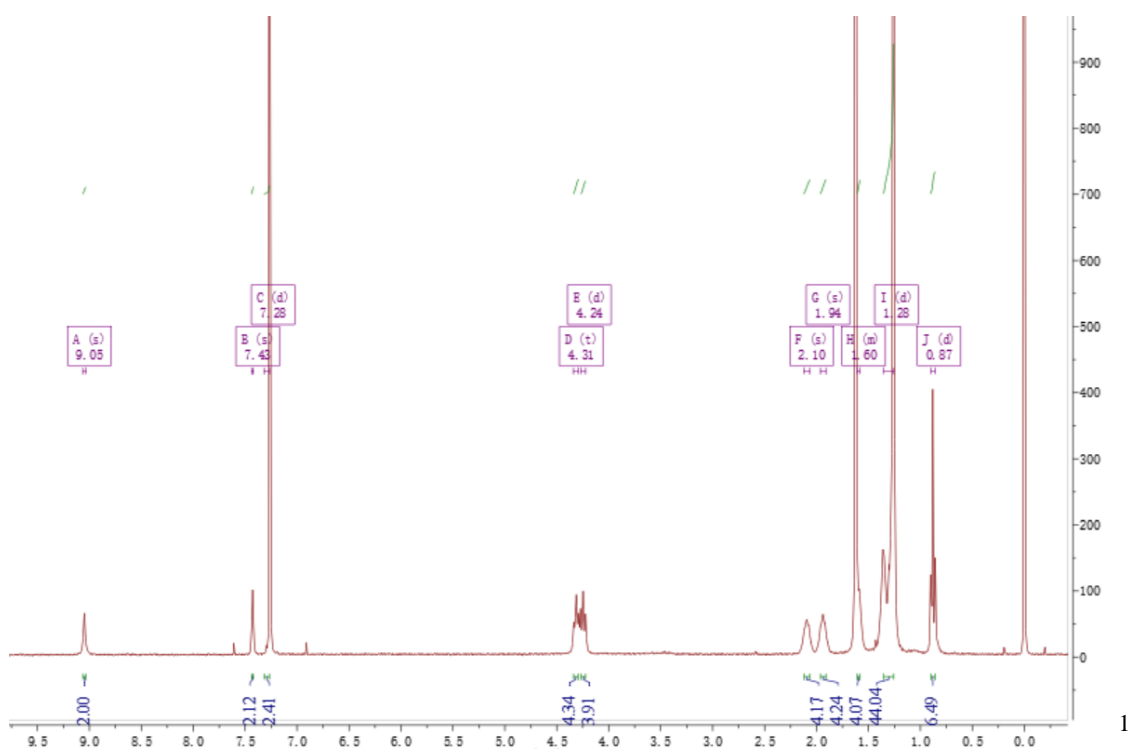

**Fig. S9.** The  $^1\text{H-NMR}$  spectra of  $[\text{C}_{14}\text{-6-C}_{14}\text{im}]\text{-Au (III)}$  in  $\text{CDCl}_3$

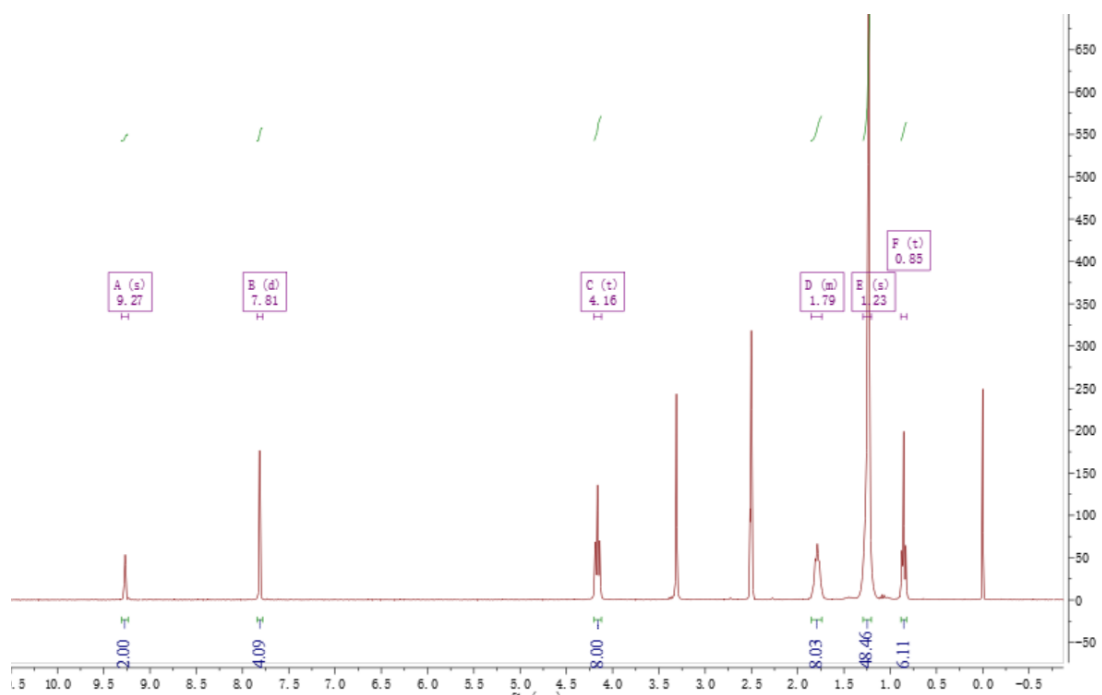

**Fig. S10.** The  $^1\text{H-NMR}$  spectra of  $[\text{C}_{14}\text{-6-C}_{14}\text{im}]\text{Br}_2$  in DMSO

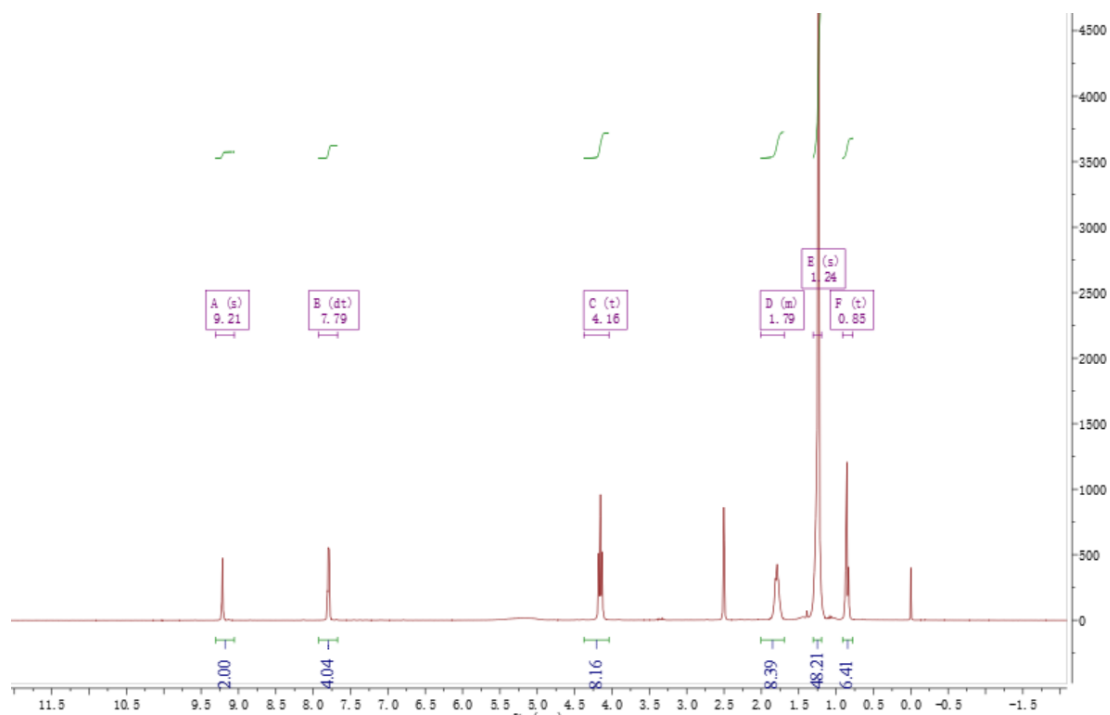

**Fig. S11.** The  $^1\text{H-NMR}$  spectra of  $[\text{C}_{14}\text{-6-C}_{14}\text{im}]\text{-Au (III)}$  in DMSO



## Reference

- 1 M. Ao, P. Huang, G. Xu, X. Yang, Y. Wang, *Colloid. Polym. Sci.*, 2008, **287**, 395.
